# Supplementary figures and images for: Ecdysone coordinates plastic growth with robust pattern in the developing wing
Source: eLife journal article supplement (doi:10.7554/elife.72666), 2022-03-09

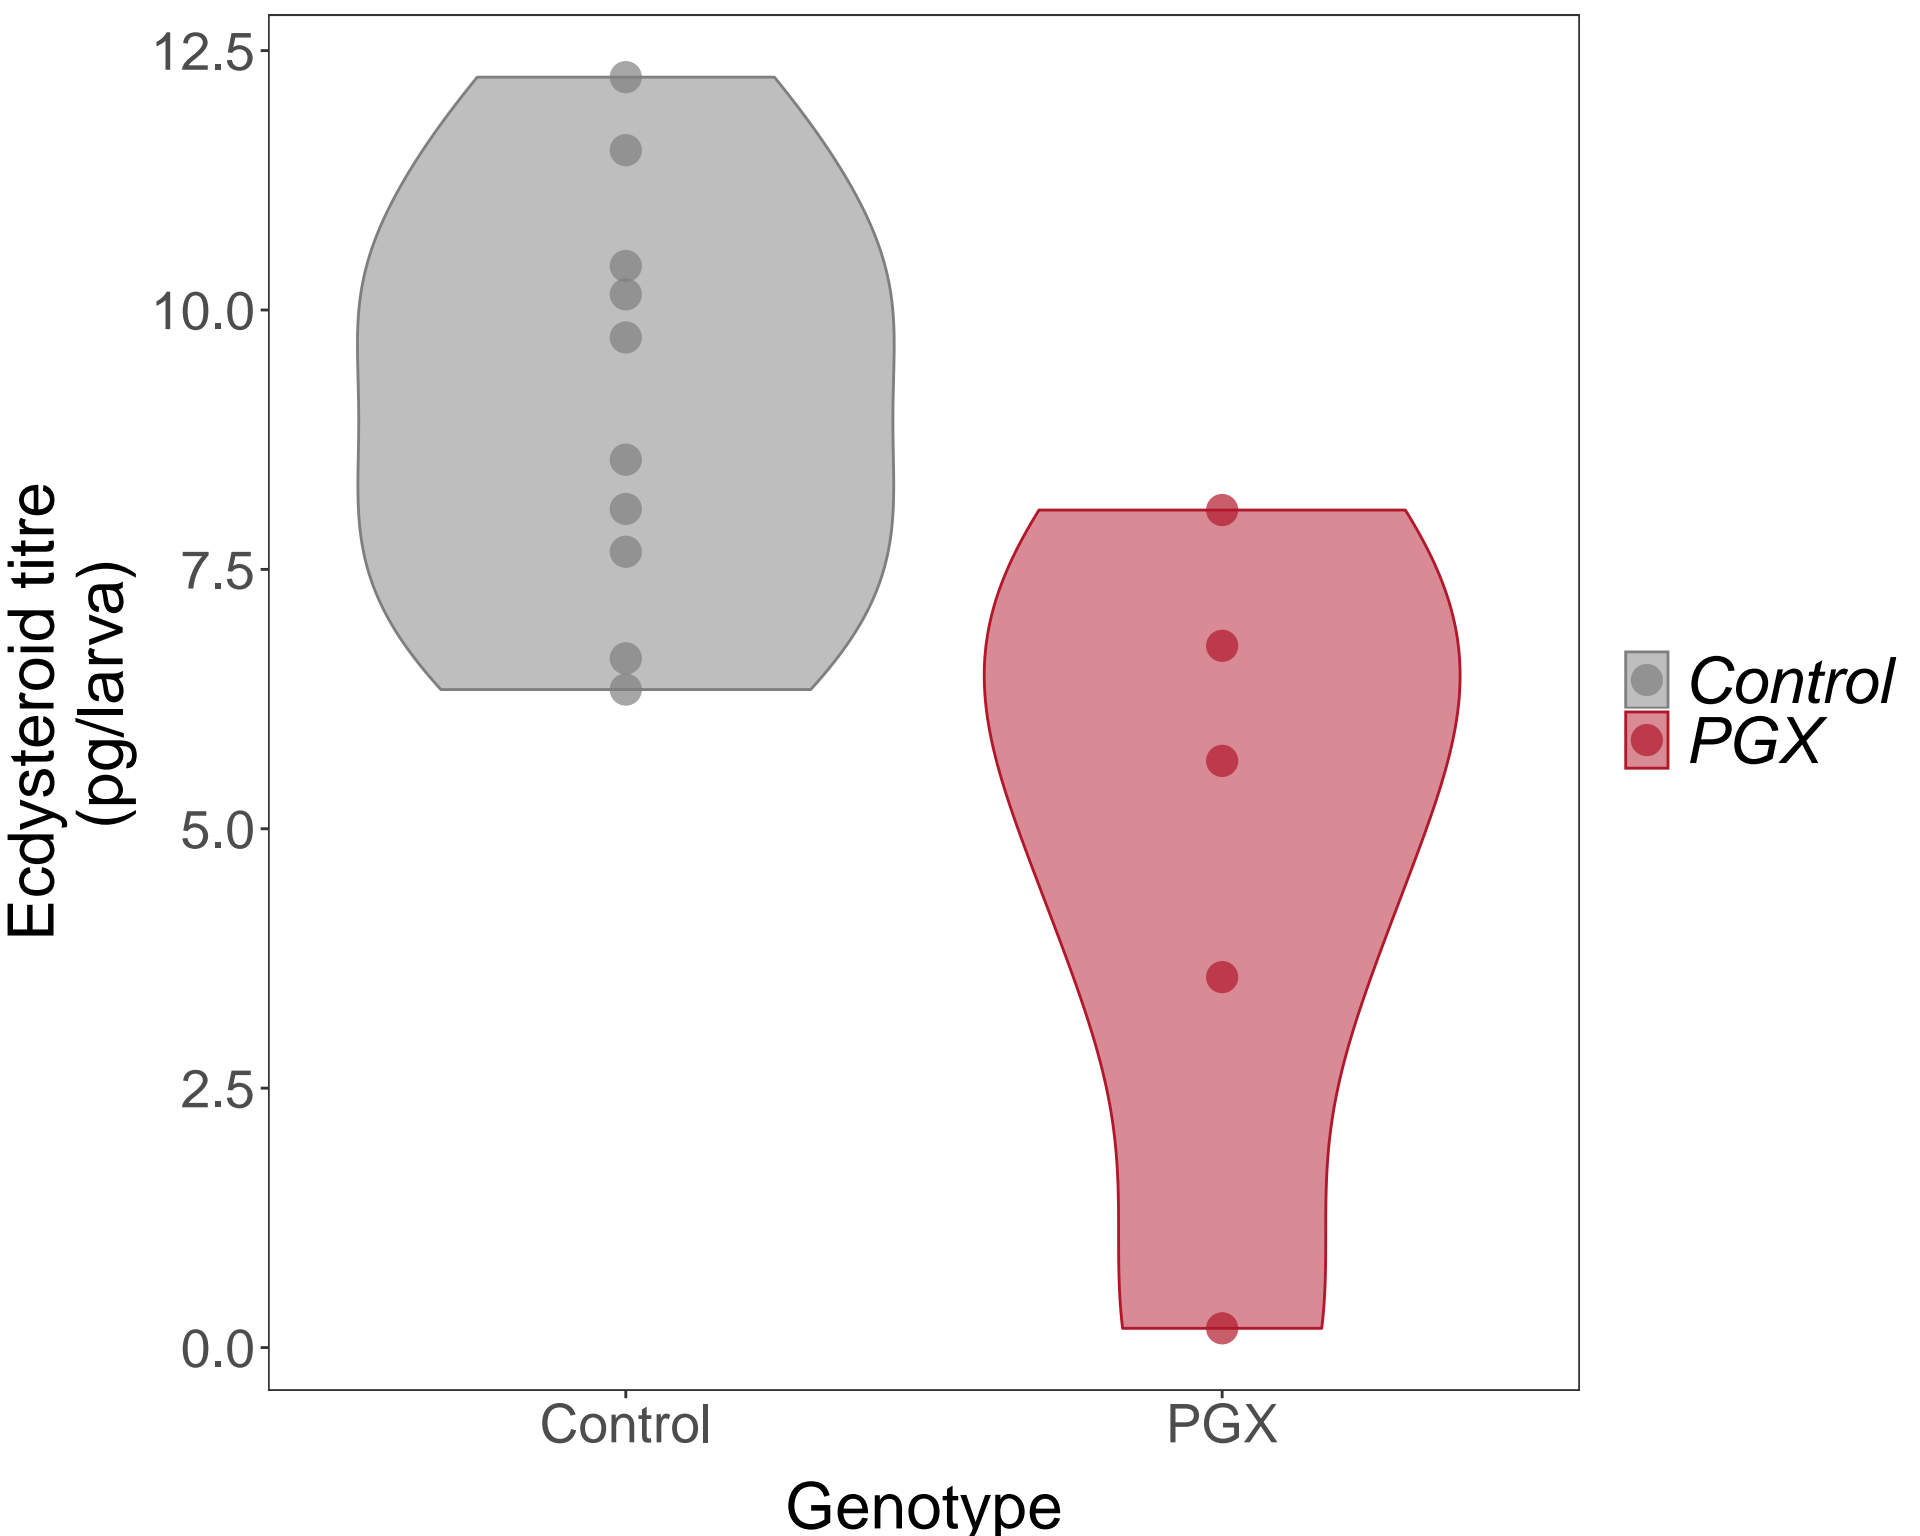

Supplement: supp [file elife-72666-supp-v1.zip]

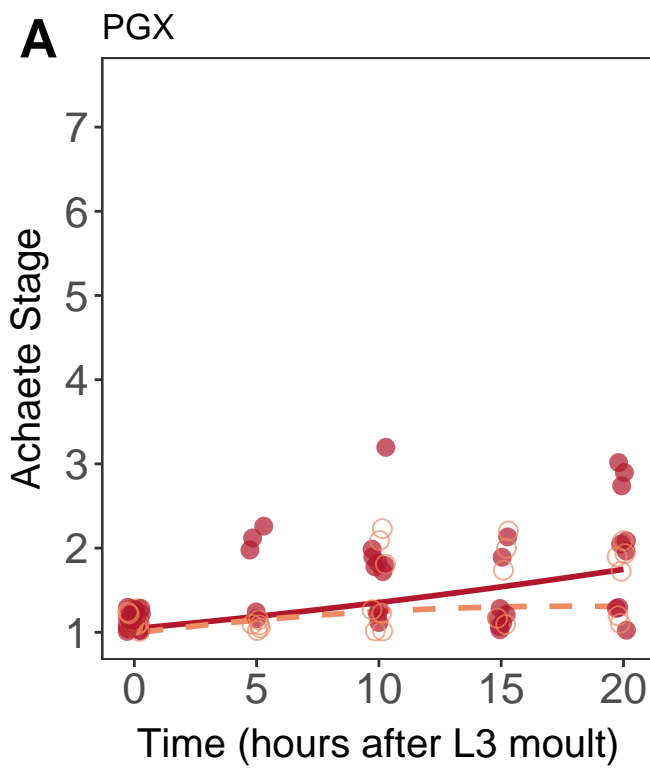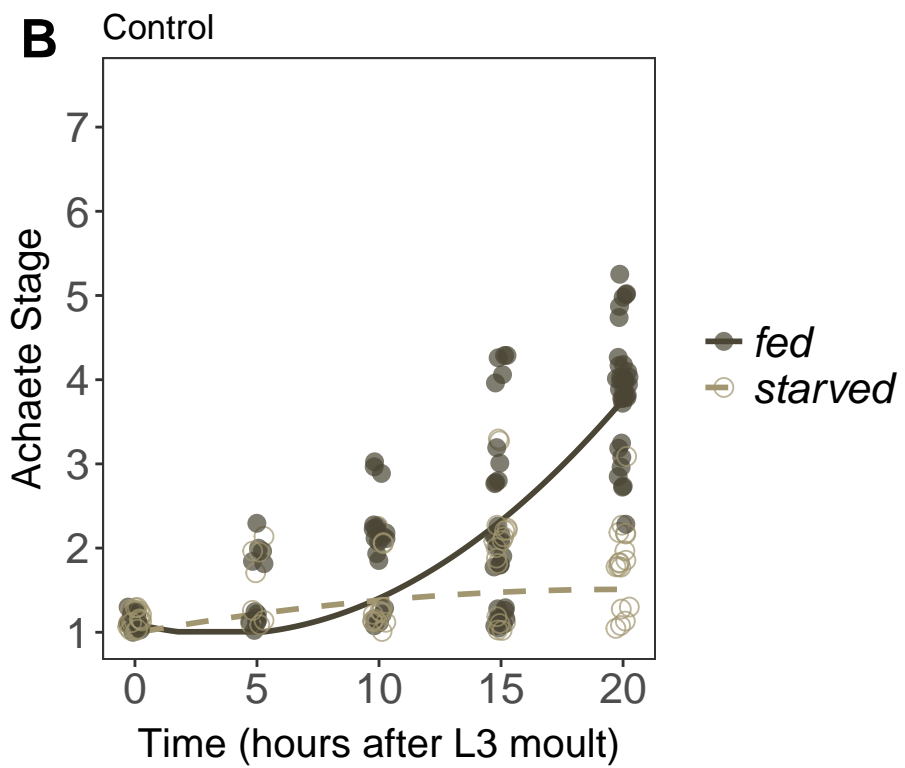

Supplement: supp [file elife-72666-supp-v1.zip]

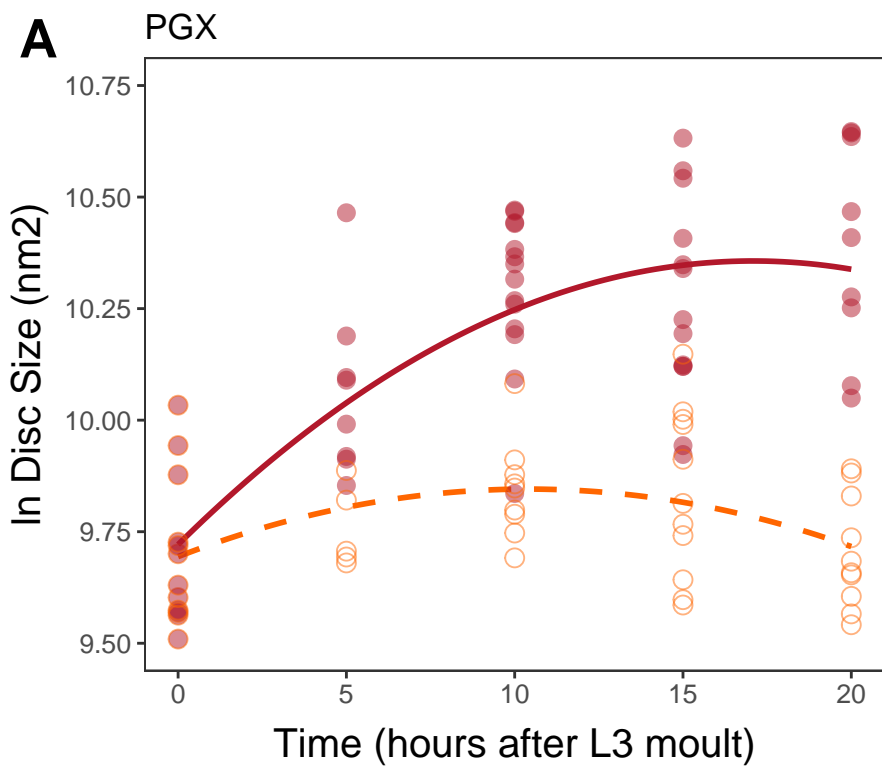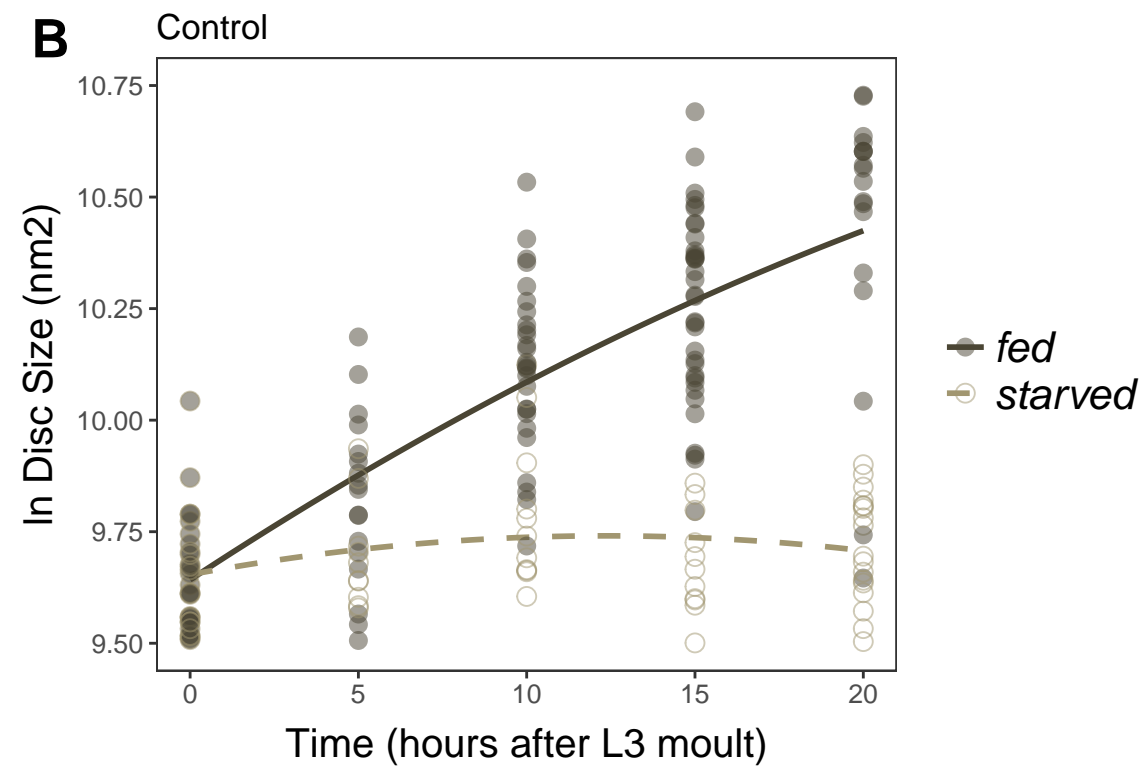

Supplement: supp [file elife-72666-supp-v1.zip]

Ecdysteroid titre  
(pg/larva)

Control

PGX

● *fed*  
○ *starved*

0 25 50 75 100 0 25 50 75 100

20E Concentration in Food (ng/ml)

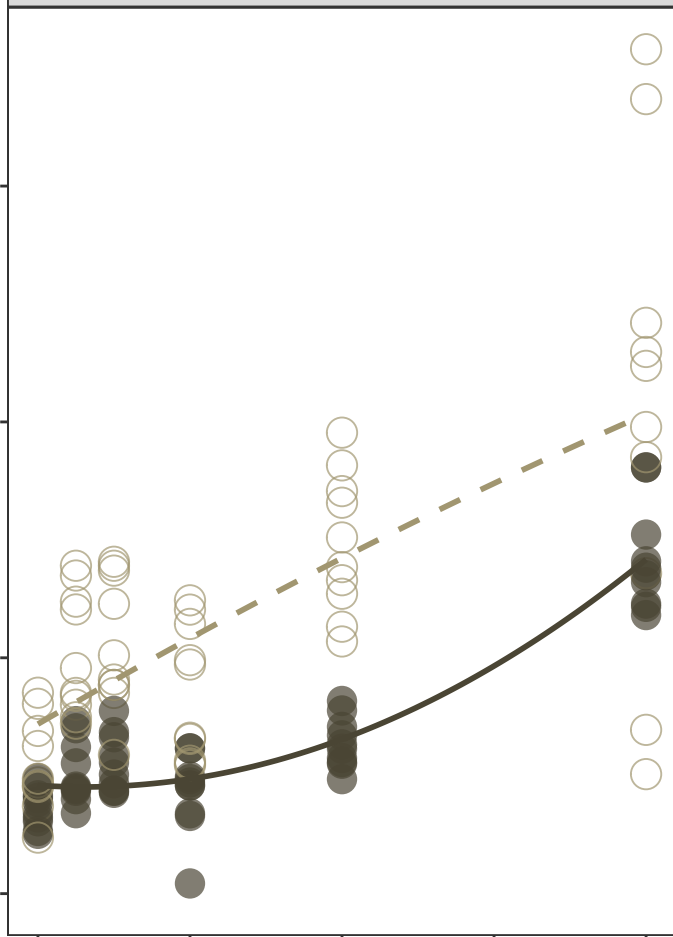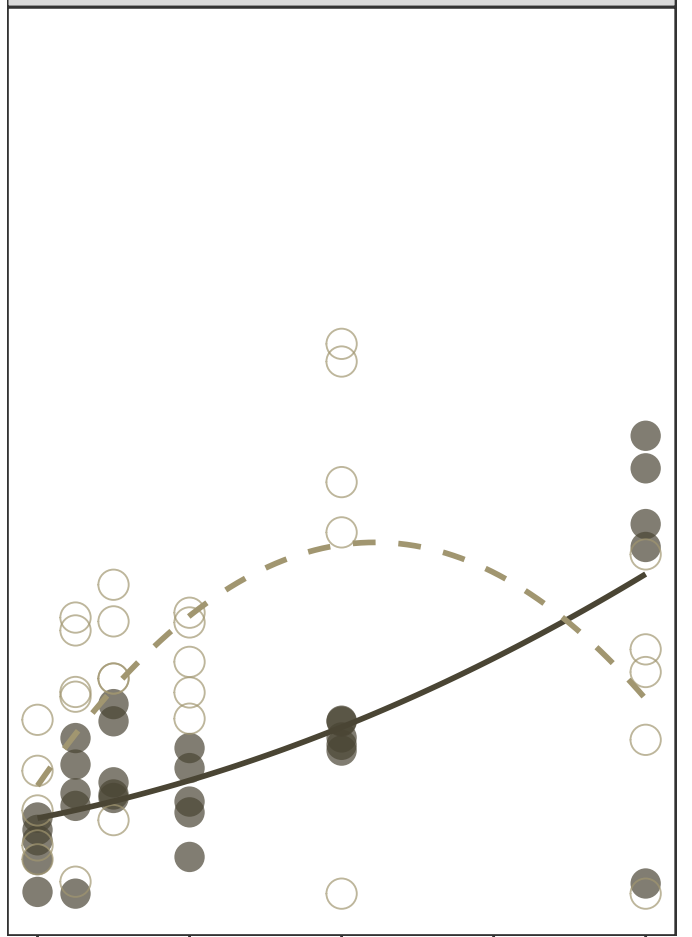

Supplement: supp [file elife-72666-supp-v1.zip]

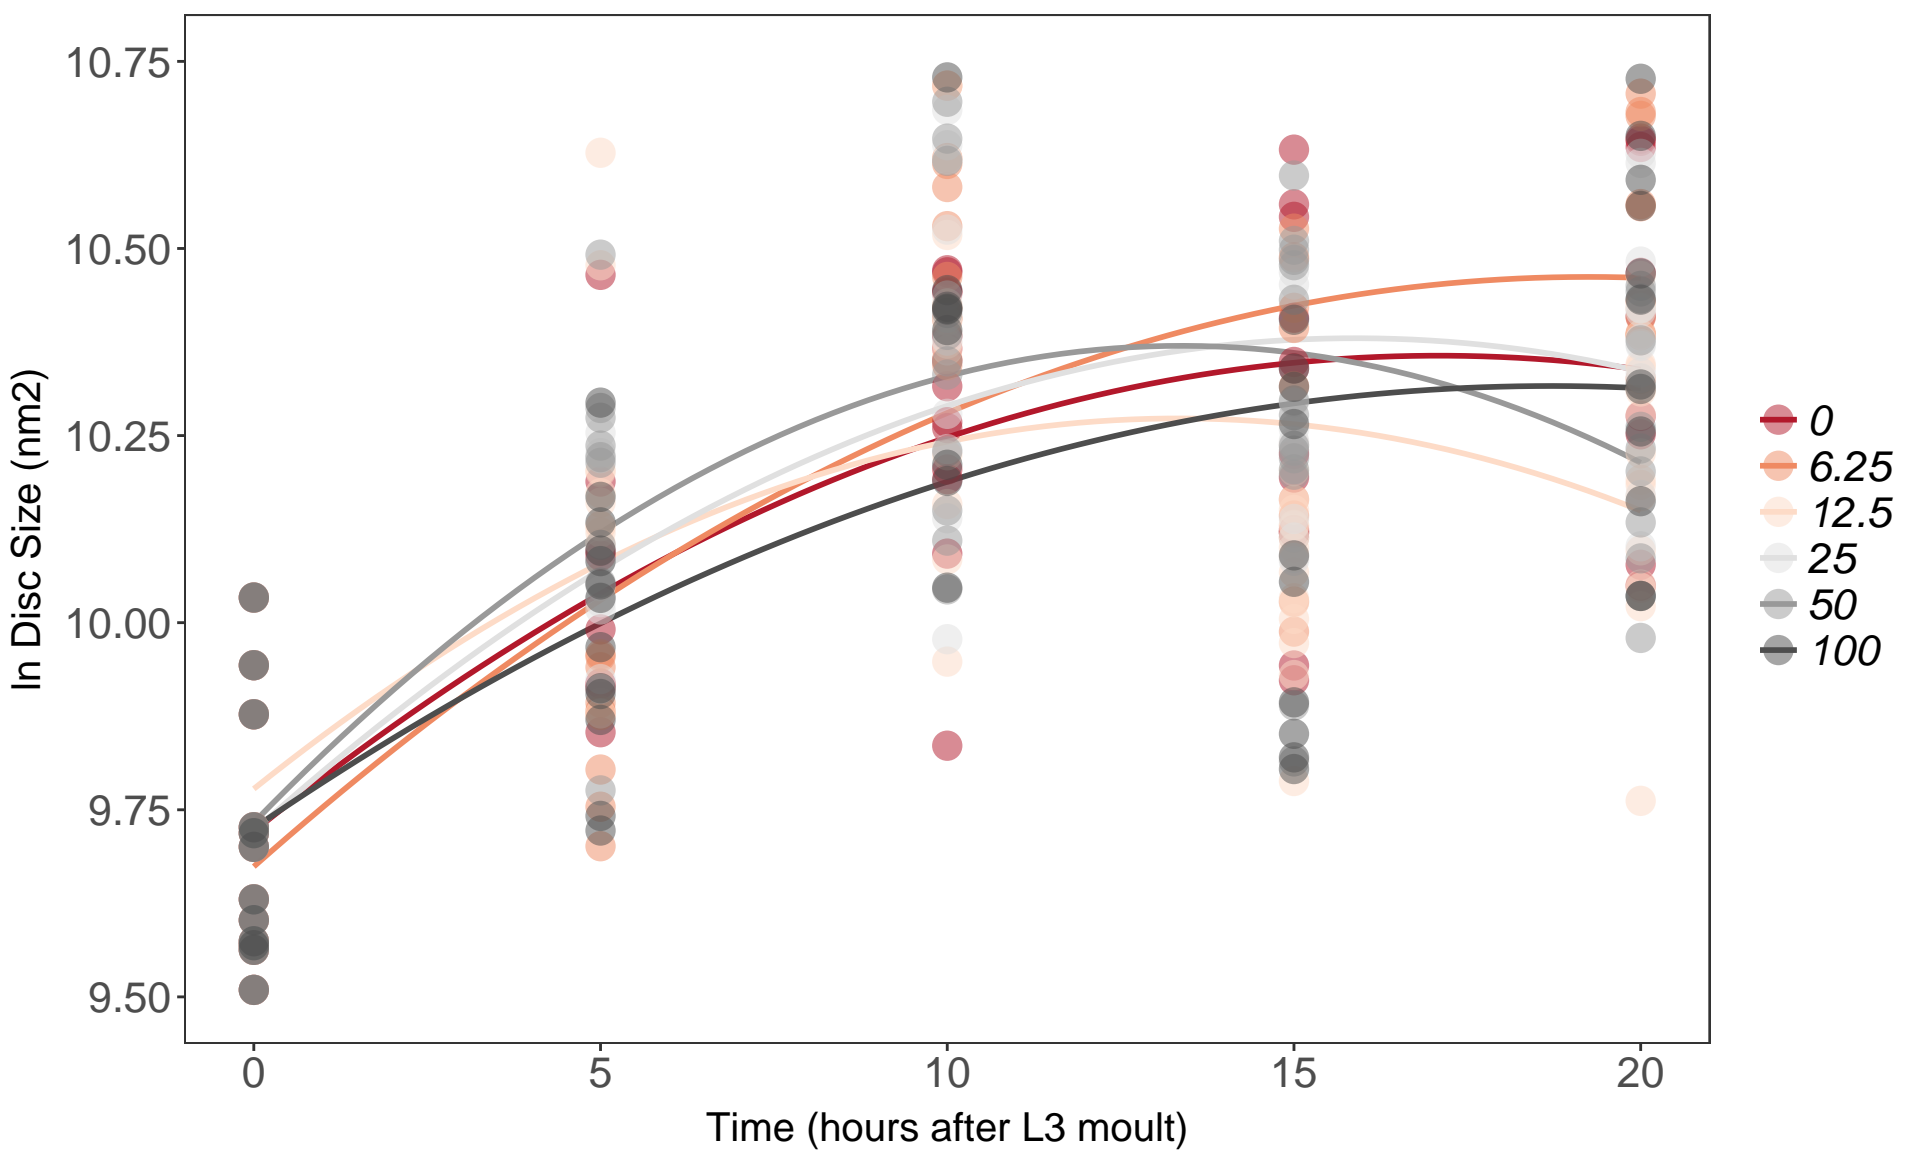

Supplement: supp [file elife-72666-supp-v1.zip]

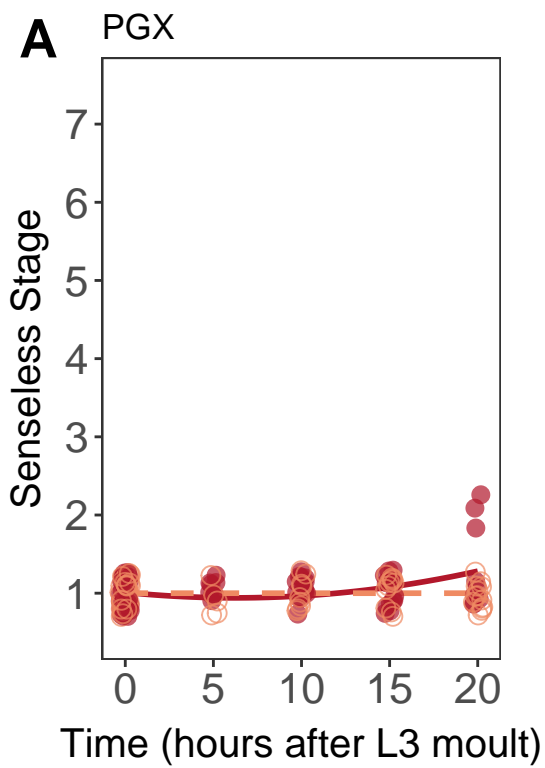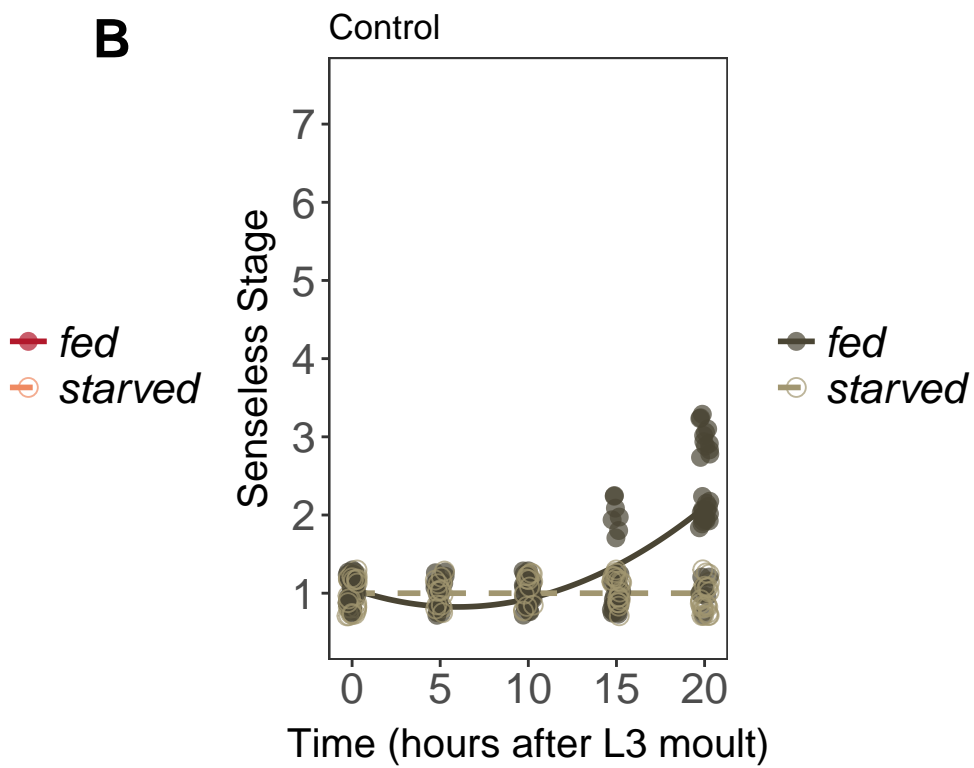

Supplement: supp [file elife-72666-supp-v1.zip]
